# Supplementary material for: Polyelectrolyte-functionalized ionic liquid for electrochemistry in supporting electrolyte-free aqueous solutions and application in amperometric flow injection analysis
Source: Royal Society of Chemistry journal article supplement (doi:10.1039/b616452h), 2007-01-01
Supplement: b616452h-1.pdf [file b616452h-1.pdf]

## Applications for ESA Products

[Electroactive?](#)
[Application Notes](#)
[Tech Notes](#)
[Cust. HiLites](#)
[Clinical Methods](#)
[Validated Meth.](#)
[Bibliography](#)
[Periodic Table](#)

### ■ How do I know if my compound is electroactive ?

Click here: [to view a model electroactive compound](#) or [to select a class of compounds](#) to review known electroactive species. Or, click on a specific **Application** area in the list below to view applications information.

| [Bioresearch](#) | [Clinical Methods/Research](#) | [Drugs and Pharmaceuticals](#) | [Environmental](#) | [Foods and Nutrition](#) | [General](#) | [Neurochemistry](#) | [Oxidative Metabolism](#) |

### ■ Bioresearch

#### **Title**

#### **Technique**

[Acetylcholine in Brain Microdialysates](#)

HPLC-ECD

[Amino Acids \(OPA/βME Derivatives\)](#)

HPLC-ECD

[In Vivo Biogenic Amines](#)

HPLC-ECD

[An Improved Monoamine Method](#)

HPLC-ECD

[Sequential Analysis of Monoamines and Amino Acids in Microdialysis Perfusates](#)

HPLC-ECD

[Biogenic Amines and Acid Metabolites- MDTM Mobile Phase- Type 2](#)

HPLC-ECD

[Antioxidants in Food](#)

HPLC-ECD

[Benidipine](#)

HPLC-ECD

[Simultaneous Analysis of Carotenoids, Retenoids etc. in Plasma](#)

HPLC-ECD

[Fractionated Urinary Catecholamines](#)

HPLC-ECD

[Plasma Catecholamines](#)

HPLC-ECD

[Catecholestrogens, Metabolites and Adducts](#)

HPLC-ECD

[7-HEG: A Catecholesterogen-Guanine Adduct](#)

HPLC-ECD

[Tea Catechins](#)

HPLC-ECD

[DHBAs and Salicylate](#)

HPLC-ECD

[Norepinephrine and Dopamine Measurement in Microdialysis Perfusates](#)

HPLC-ECD

[Ultra Sensitive Analysis of DA and 5HT in Brain Microdialysates](#)

HPLC-ECD

[Regional Measurement of Dopamine and Norepinephrine](#)

HPLC-ECD

[Fast Analysis of Dopamine and Serotonin](#)

HPLC-ECD

[Fast Analysis of GABA](#)

HPLC-ECD

[Guanine Adducts](#)

HPLC-ECD

[Handbook of Lipids](#)

HPLC-ELS

[Measurement of Hydroxyl Free Radical \(DHBAs and Salicylate\)](#)

HPLC-ECD

[An Alternative Method for Hydroxyl Free Radical Measurement \*In Vivo\*](#)

HPLC-ECD

[4-Hydroxynonenal](#)

HPLC-Fluoro

[Total Plasma Homocysteine](#)

HPLC-ECD

[An Alternative Method for Plasma Homocysteine](#)

HPLC-ECD

[Measurements of Resveratrol, Kaemferol, Quercetin and Isorhamnetin in Human Plasma](#)

HPLC-ECD

[Phenolics & Flavonoids](#)

HPLC-ECD

|                                                                                                            |             |
|------------------------------------------------------------------------------------------------------------|-------------|
| <a href="#">Malondialdehyde</a>                                                                            | HPLC-Fluoro |
| <a href="#">Measurement of 3-Nitrotyrosine</a>                                                             | HPLC-ECD    |
| <a href="#">Detection of Free Proanthocyanidins</a>                                                        | HPLC-ECD    |
| <a href="#">Analysis of Plasma and Tissue Phytoestrogens</a>                                               | HPLC-ECD    |
| <a href="#">Analysis of Urinary Phytoestrogens</a>                                                         | HPLC-ECD    |
| <a href="#">Plasma &amp; Whole Blood Thiols: Glutathione, Homocysteine, Cysteine and Cysteinyl-glycine</a> | HPLC-Fluoro |
| <a href="#">Fat-soluble Vitamins</a>                                                                       | HPLC-ECD    |
| <a href="#">Multivitamins in Tablets, Infant Formula and Milk</a>                                          | HPLC-ECD    |
| <a href="#">25-Hydroxy Vitamin D3 in Plasma</a>                                                            | HPLC-ECD    |

 Page Top

## ■ Clinical Methods

### **Title**

|                                                                                          |          |
|------------------------------------------------------------------------------------------|----------|
| <a href="#">Plasma Free Metanephrine Analysis</a>                                        | HPLC-ECD |
| <a href="#">Urinary Metanephrines</a>                                                    | HPLC-ECD |
| <a href="#">Fractionated Urinary Catecholamines</a>                                      | HPLC-ECD |
| <a href="#">Lead Analysis in Blood</a>                                                   | ASV      |
| <a href="#">Simultaneous Determination of Urinary VMA, 5HIAA, HVA Without Extraction</a> | HPLC-ECD |

### **Technique**

## ■ Clinical Research *For research use only!*

### **Title**

|                                                                                                            |          |
|------------------------------------------------------------------------------------------------------------|----------|
| <a href="#">Analysis of Urinary 5HIAA</a>                                                                  | HPLC-ECD |
| <a href="#">Carotenoid Isomers</a>                                                                         | HPLC-ECD |
| <a href="#">Deconvolution of Curry Powder Constituents</a>                                                 | HPLC-ECD |
| <a href="#">Lipoic acid and DHBA in Food Supplements</a>                                                   | HPLC-ECD |
| <a href="#">Tea Catechins</a>                                                                              | HPLC-ECD |
| <a href="#">Fat-soluble Vitamins</a>                                                                       | HPLC-ECD |
| <a href="#">25-Hydroxy Vitamin D3 in Plasma</a>                                                            | HPLC-ECD |
| <a href="#">Total Plasma Homocysteine</a>                                                                  | HPLC-ECD |
| <a href="#">An Alternative Method for Plasma Homocysteine</a>                                              | HPLC-ECD |
| <a href="#">Measurements of Resveratrol, Kaempferol, Quercetin and Isorhamnetin in Human Plasma</a>        | HPLC-ECD |
| <a href="#">Multivitamins in Tablets, Infant Formula and Milk</a>                                          | HPLC-ECD |
| <a href="#">Analysis of Plasma and Tissue Phytoestrogens</a>                                               | HPLC-ECD |
| <a href="#">Analysis of Urinary Phytoestrogens</a>                                                         | HPLC-ECD |
| <a href="#">Fractionated Urinary Catecholamines</a>                                                        | HPLC-ECD |
| <a href="#">Plasma Catecholamines</a>                                                                      | HPLC-ECD |
| <a href="#">Plasma &amp; Whole Blood Thiols: Glutathione, Homocysteine, Cysteine and Cysteinyl-glycine</a> | HPLC-ECD |
| <a href="#">Simultaneous Analysis of Carotenoids, Retenoids etc. in Plasma</a>                             | HPLC-ECD |

### **Technique**

|                                                     |          |
|-----------------------------------------------------|----------|
| <a href="#">Tryptophan Contamination</a>            | HPLC-ECD |
| <a href="#">Flavonoids and Phenolics</a>            | HPLC-ECD |
| <a href="#">Xenoestrogens- Bisphenols</a>           | HPLC-ECD |
| <a href="#">Detection of Free Proanthocyanidins</a> | HPLC-ECD |

 Page Top

## ■ Drugs and Pharmaceuticals

### **Title**

|                                                                                                        |          |
|--------------------------------------------------------------------------------------------------------|----------|
| <a href="#">Acyclovir in Human Plasma</a>                                                              | HPLC-ECD |
| <a href="#">Benidipine</a>                                                                             | HPLC-ECD |
| <a href="#">Carbohydrate Analysis in Beverages</a>                                                     | HPLC-PAD |
| <a href="#">Detection of Chiral Compounds</a>                                                          | HPLC-ECD |
| <a href="#">DNA Adduct Analysis</a>                                                                    | HPLC-ECD |
| <a href="#">Handbook of Lipids</a>                                                                     | HPLC-ELS |
| <a href="#">Tryptophan Contamination</a>                                                               | HPLC-ECD |
| <a href="#">In Vivo Pharmacokinetics: Simultaneous Measurement of Drug Level and Metabolic Effects</a> | HPLC-ECD |
| <a href="#">Tricyclic Antidepressants</a>                                                              | HPLC-ECD |
| <a href="#">Vinca Alkaloids</a>                                                                        | HPLC-ECD |
| <a href="#">Fat-soluble Vitamins</a>                                                                   | HPLC-ECD |
| <a href="#">Yohimbine</a>                                                                              | HPLC-ECD |

### **Technique**

 Page Top

## ■ Environmental

### **Title**

|                                                                                                                                              |             |
|----------------------------------------------------------------------------------------------------------------------------------------------|-------------|
| <a href="#">Determination of Priority Phenols and Chlorophenols in Water by HPLC with Coulometric Electrochemical Array and UV Detection</a> | HPLC-UV-ECD |
| <a href="#">Xenoestrogens- Bisphenols</a>                                                                                                    | HPLC-ECD    |
| <a href="#">Explosives</a>                                                                                                                   | HPLC-ECD    |
| <a href="#">Measurement of Environmental Estrogens in Water- Analytical Methodology</a>                                                      | HPLC-ECD    |
| <a href="#">Phytoestrogens</a>                                                                                                               | HPLC-ECD    |

## ■ Foods and Nutrition

### **Title**

|                                                    |          |
|----------------------------------------------------|----------|
| <a href="#">Antioxidant Preservatives in Food</a>  | HPLC-ECD |
| <a href="#">Capsaicinoids</a>                      | HPLC-ECD |
| <a href="#">Carbohydrate Analysis in Beverages</a> | HPLC-ECD |
| <a href="#">Simple Carbohydrates</a>               | HPLC-ELS |

### **Technique**

|                                                              |          |
|--------------------------------------------------------------|----------|
| <a href="#">Fat Soluble Vitamins</a>                         | HPLC-ECD |
| <a href="#">Flavonoids &amp; Phenolics</a>                   | HPLC-ECD |
| <a href="#">Handbook of Lipids</a>                           | HPLC-ELS |
| <a href="#">Nonionic Surfactants</a>                         | HPLC-ELS |
| <a href="#">Oligosaccharides</a>                             | HPLC-ELS |
| <a href="#">Polyethylene Glycol</a>                          | HPLC-ELS |
| <a href="#">Phenolic Preservatives</a>                       | HPLC-ECD |
| <a href="#">Phytoestrogens</a>                               | HPLC-ECD |
| <a href="#">Tea Catechins</a>                                | HPLC-ECD |
| <a href="#">Triglycerides</a>                                | HPLC-ELS |
| <a href="#">Vitamin E, Tocopherols- Fat Soluble Vitamins</a> | HPLC-ECD |
| <a href="#">VitaScan™</a>                                    | HPLC-ECD |

 Page Top

## ■ General

### **Title**

| <b>Title</b>                                                                                    | <b>Technique</b> |
|-------------------------------------------------------------------------------------------------|------------------|
| <a href="#">Acetylcholine Mobile Phase</a>                                                      | HPLC-ECD         |
| <a href="#">Bibliography of Redox References</a>                                                | HPLC-ECD         |
| <a href="#">Coulometric Electrode</a>                                                           | HPLC-ECD         |
| <a href="#">Derivatives for HPLC-ECD</a>                                                        | HPLC-ECD         |
| <a href="#">Electrode and Photodiode Arrays</a>                                                 | HPLC-ECD         |
| <a href="#">Guidelines for Mobile Phase Selection and Preparation when using an EC Detector</a> | HPLC-ECD         |
| <a href="#">MD-TM Mobile Phase</a>                                                              | HPLC-ECD         |
| <a href="#">Biogenic Amines and Acid Metabolites- MDTM Mobile Phase- Type 2</a>                 | HPLC-ECD         |
| <a href="#">Microbore Analysis</a>                                                              | HPLC-ECD         |
| <a href="#">Prolonging Coulometric Cell Performance</a>                                         | HPLC-ECD         |
| <a href="#">Ratio Accuracy</a>                                                                  | HPLC-ECD         |
| <a href="#">Reference Electrode</a>                                                             | HPLC-ECD         |
| <a href="#">Troubleshooting Model 580/582 Pumps</a>                                             | HPLC             |
| <a href="#">Water Polishing</a>                                                                 | HPLC-ECD         |
| <a href="#">Working Electrode- Part 1</a>                                                       | HPLC-ECD         |
| <a href="#">Working Electrode- Part 2</a>                                                       | HPLC-ECD         |

 Page Top

## ■ Neurochemistry

### **Title**

| <b>Title</b>                                           | <b>Technique</b> |
|--------------------------------------------------------|------------------|
| <a href="#">Acetylcholine in Brain Microdialysates</a> | HPLC-ECD         |
| <a href="#">Amino Acids (OPA/βME Derivatives)</a>      | HPLC-ECD         |

|                                                                                                  |          |
|--------------------------------------------------------------------------------------------------|----------|
| <a href="#">In Vivo Biogenic Amines</a>                                                          | HPLC-ECD |
| <a href="#">Biogenic Amines and Acid Metabolites- MDTM Mobile Phase- Type 2</a>                  | HPLC-ECD |
| <a href="#">Sequential Analysis of Monoamines and Amino Acids in Microdialysis Perfusates</a>    | HPLC-ECD |
| <a href="#">An Improved Monoamine Method</a>                                                     | HPLC-ECD |
| <a href="#">Supra-Coulometric Electrochemical Detection of Catecholamines at Sub-5 fg Levels</a> | HPLC-ECD |
| <a href="#">Enkephalins</a>                                                                      | HPLC-ECD |
| <a href="#">Fast Analysis of Dopamine and Serotonin</a>                                          | HPLC-ECD |
| <a href="#">GABA</a>                                                                             | HPLC-ECD |
| <a href="#">Fast Analysis of GABA</a>                                                            | HPLC-ECD |
| <a href="#">Measurement of Hydroxyl Free Radical (DHBAs and Salicylate)</a>                      | HPLC-ECD |
| <a href="#">Norepinephrine and Dopamine in Microdialysis Perfusates</a>                          | HPLC-ECD |
| <a href="#">Regional Measurement of Dopamine and Norepinephrine</a>                              | HPLC-ECD |
| <a href="#">Ultra Sensitive Analysis of DA and 5HT in Brain Microdialysates</a>                  | HPLC-ECD |
| <a href="#">Measurement of 3-Nitrotyrosine</a>                                                   | HPLC-ECD |

 Page Top

## ■ Oxidative Metabolism

| <b>Title</b>                                                                               | <b>Technique</b> |
|--------------------------------------------------------------------------------------------|------------------|
| <a href="#">The ESA Handbook of Oxidative Metabolism</a>                                   | HPLC-ECD         |
| <a href="#">Antioxidants in Food</a>                                                       | HPLC-ECD         |
| <a href="#">Catecholestrogens, Metabolites and Adducts</a>                                 | HPLC-ECD         |
| <a href="#">Tea Catechins</a>                                                              | HPLC-ECD         |
| <a href="#">DHBAs and Salicylate</a>                                                       | HPLC-ECD         |
| <a href="#">Guanine Adducts</a>                                                            | HPLC-ECD         |
| <a href="#">An Alternative Method for Hydroxyl Free Radical Measurement <i>In Vivo</i></a> | HPLC-ECD         |
| <a href="#">4-Hydroxynonenal</a>                                                           | HPLC-Fluoro      |
| <a href="#">7-HEG: A Catecholesterogen-Guanine Adduct</a>                                  | HPLC-ECD         |
| <a href="#">Handbook of Lipids</a>                                                         | HPLC-ELS         |
| <a href="#">Malondialdehyde</a>                                                            | HPLC-Fluoro      |
| <a href="#">Measurement of 3-Nitrotyrosine</a>                                             | HPLC-ECD         |
| <a href="#">Phenolics &amp; Flavonoids</a>                                                 | HPLC-ECD         |
| <a href="#">Phytoestrogens</a>                                                             | HPLC-ECD         |
| <a href="#">Proanthocyanidins</a>                                                          | HPLC-ECD         |
| <a href="#">Fat -Soluble Vitamins</a>                                                      | HPLC-ECD         |

 Page Top

## ■ Validated Methods

**Title**[Vitascan™](#)[Vitascan™ K1](#)[8-Hydroxy-2'-Deoxyguanosine](#)**Technique**

HPLC-ECD

HPLC-Fluoro

HPLC-ECD

[Electroactive?](#)[Application Notes](#)[Tech Notes](#)[Cust. HiLites](#)[Clinical Methods](#)[Validated Meth.](#)[Bibliography](#)[Periodic Table](#)[Home](#)[Up](#)[Metabolomics](#)[Site Search](#)[Suggestions](#)[Privacy Policy](#)[Terms of Use](#)**ESA Biosciences, Inc.***A Magellan Biosciences Company*

22 Alpha Road, Chelmsford, MA 01824 USA

*An ISO 9001 / 13485 Certified Company*

Phone: 978-250-7000 Fax: 978-250-7090 US Orders: 800-959-5095

E-mail: [info@esainc.com](mailto:info@esainc.com)Comments: [marketing@esainc.com](mailto:marketing@esainc.com)

This web page was updated on July 10, 2006.

© 1996 - 2006 ESA, Inc. All rights reserved.
